# Supplementary material
Source: PubMed Central journal article supplement (PMC3065294)
Supplement: NIHMS272981-supplement-Supp1.pdf [file NIHMS272981-supplement-Supp1.pdf]

## Supplemental Material

Video 1. Cine echocardiography in an apical four-chamber view shows contraction abnormality of the right ventricle.

Video 2. Multiphase cine reconstruction in short axis (upper left), horizontal long axis (lower left) and oblique sagittal planes show regional aneurysms and dyskinesis (arrows) of the right ventricle in a patient with ARVC. This patient sought counseling with a cardiovascular genetics team, and is contemplating genetic testing.
